# Supplementary material for: Partial Freezing Enables Functional Preservation of Kidney Grafts for up to 10 Days
Source: Research Square preprint supplement (doi:10.21203/rs.3.rs-7820837/v1), 2026-01-14
Supplement: Supplementary file 1 [file 1bb5f8220bee8b331a97a938.docx]

**Partial Freezing Enables Functional Preservation of Kidney Grafts for up to 10 Days**

*Supporting Information*

McLean Taggart1,2,3, Madeeha Hasssan1,2,3, Arnaud Lyon1,2,3,4, Ozge S. Ozgur1,2,3, Christopher Taveras1,2,3, Mohammadreza Mojoudi1,2,3,5, Thomas Agius1,2,3,6, Sophie Van Tulder1,2,3,7, Christina Zheng8, Michael R. MacArthur8, James F. Markmann9, Heidi Yeh1,2,3*,* Shannon N. Tessier1,2, Mehmet Toner1,2, Alban Longchamp1,2,3,✉, Korkut Uygun1,2, ✉.

Affiliations

*1Center for Engineering in Medicine and Surgery, Massachusetts General Hospital & Harvard Medical School, Boston, MA*

*2Shriners Children’s, Boston, MA, USA*

*3Transplant Center, Department of Surgery, Massachusetts General Hospital, Harvard Medical School, Boston, MA, USA*

*4Transplantation Center and Transplantation Immunopathology Laboratory, Lausanne University Hospital (CHUV), University of Lausanne (UNIL), Lausanne, Vaud, Switzerland*

*5Department of Molecular Biosciences, The University of Texas at Austin, Austin, TX, USA*

*6Laboratory of Sustainable Food Processing, Institute of Food, Nutrition and Health, ETH Zurich, Zürich, Switzerland*

*7Leiden University Medical Center, Leiden, the Netherlands*

*8Lewis-Sigler Institute of Integrative Genomics, Princeton University, Princeton, NJ, USA*

*9Penn Transplant Institute, University of Pennsylvania, Philadelphia, PA, USA*

*10Division of Cardiac Surgery, Department of Surgery, Massachusetts General Hospital and Harvard Medical School, Boston, MA, USA*

✉Corresponding authors

[ALONGCHAMP@mgh.harvard.edu](mailto:ALONGCHAMP@mgh.harvard.edu)

KUYGUN@mgh.harvard.edu

**Supplementary Table 1. Human Kidney Donor Demographics**

|  | 3 Day Storage | | | | 10 Day Storage | | |
| --- | --- | --- | --- | --- | --- | --- | --- |
| Age | 77 | 77 | 75 | N/A | 35 | 75 | N/A |
| Sex | F | F | M | N/A | F | M | N/A |
| BMI | 29 | 29 | 32 | N/A | 40 | 32 | N/A |
| Pump (Y/N) | Y | Y | Y | N | Y | Y | N |
| Ischemia (hh:mm) |  |  |  | N/A |  |  | N/A |
| Warm | 0 | 0 | 0 | N/A | 0 | 0 | N/A |
| Cold | 16:08 | 16:08 | 18:52 |  | 37:00 | 18:52 |  |
| Sclerosis (%) | 31 | 22 | 0 | N/A | 2 | 20 | N/A |
| KDPI (%) | 95 | 95 | 100 | N/A | 36 | 100 | N/A |

**Supplementary Table 2. Pig Kidney Partial Freezing Solution Compositions**

|  | Loading | Storage 1 | Storage 2 | Thawing | Recovery | Simulated Transplant |
| --- | --- | --- | --- | --- | --- | --- |
| Total Volume | 1L | 1.5L | 0.7L | 1L | 1L | 1L |
| Base Solution | WE | WE | UW | WE | WE | WE |
| PEG 35k | 2% | 2% | 10% | 2% | 2% | - |
| Dexamethasone | 61.2 μM | 61.2 μM | 61.2 μM | 61.2 μM | 61.2 μM | 61.2 μM |
| Bovine Serum Albumin | 1% | 1% | - | 1% | 2% | 4% |
| 3-O-methyl-D-Glucopyranose | 100 mM | 100 mM | 100 mM | 100 mM | - | - |
| Hydroxyethyl starch (130/.4) | - | 3% | - | 3% | - | - |
| Raffinose | - | 35.3 mM |  | 35.3 mM | - | - |
| Trehalose | - |  | 55 mM | 110 mM | - | - |
| L-glutathione reduced | - | - | - | 5.0 mM | 5.0 mM | - |
| Furosemide | - | - | - | 0.4 mM | 0.4 mM | - |
| Creatinine | - | - | - | 1.0 mM | 1.0 mM | - |
| Snomax | - | - | 0.1% | - | - | - |
| Propylene Glycol |  | 6% | 12% | 6% | - | - |
| Penicillin Streptomycin | 4 mL | 6 mL | - | 4 mL | 4 mL | 4 mL |
| Heparin | 10 mL | 6 mL | - | 4 mL | 10 mL | 20 mL |
| Insulin | 2 mL | 3 mL | 70 uL | 200 uL | 100 uL | 100 uL |
| Heparinized Blood | - | - | - | - | - | 200 mL |

**Supplementary Table 3. Human Kidney Partial Freezing Solution Compositions**

*Added after 3 hours of perfusion

|  | Loading | Storage 1 | Storage 2 | Thawing | Recovery 1 | Recovery 2 | Simulated Transplant |
| --- | --- | --- | --- | --- | --- | --- | --- |
| Total Volume | 2L | 2L | 1L | 1.5L | 1L | 2L | 2L |
| Base Solution | WE | WE | UW | WE | WE | WE | WE |
| PEG 35k | 2%* | 2% | 10% | 2% | 2% | - | - |
| Dexamethasone | 61.2 μM | 61.2 μM | 61.2 μM | 61.2 μM | 61.2 μM | 61.2 μM | 61.2 μM |
| Bovine Serum Albumin | 1% | 1% | - | 1% | 1% | 2% | 4% |
| 3-O-methyl-D-Glucopyranose* | 100 mM | 100 mM | 100 mM | 100 mM | - | - | - |
| Hydroxyethyl starch (130/.4) | - | 3% | - | 3% | - | - | - |
| Raffinose | - | 35.3 mM |  | 35.3 mM | - | - | - |
| Trehalose | - |  | 55 mM | 110 mM | - | - | - |
| L-glutathione reduced | - | - | - | 5.0 mM | 5.0 mM | 5.0 mM | - |
| Furosemide | - | - | - | 0.4 mM | - | 0.4 mM | - |
| Creatinine | - | - | - | 1.0 mM | - | 1.0 mM | - |
| Snomax | - | - | 0.1% | - | - | - | - |
| Propylene Glycol |  | 6% | 12% | 6% | - | - | - |
| Penicillin Streptomycin | 8 mL | 8 mL | - | 6 mL | 10 mL | 20 mL | 20 mL |
| Heparin | 20 mL | 8 mL | - | 4 mL |  | 10 mL | 20 mL |
| Insulin | 4 mL | 4 mL | 100 uL | 300 uL | 100 uL | 100 uL | 100 uL |
| pRBC | - | - | - | - | - | - | 1U |
| FFP | - | - | - | - | - | - | 1U |

**Supplementary Figure 1: Subnormothermic Recovery of Partially Frozen Pig Kidneys**

Graphs detailing perfusion parameters during subnormothermic machine perfusion, including **a,** oxygen consumption, **b,** arterial flow, **c,** arterial resistance, **d**, venous lactate, and **e**, venous potassium. Graph depicting functionality parameter **f**, creatinine clearance rate. **g,** Representative histology stained with PAS at the end of subnormothermic machine perfusion and **h,** histological scoring. Pairwise comparison was conducted on terminal values by an unpaired t-test. ** p < 0.05; ns, not significant*

**Supplementary Figure 2. Transmission Electron Microscopy of Pig Kidneys**

**a,** Representative transmission electron microscopy imaging of biopsies taken at the end of simulated transplantation. All images were taken at 10,000X magnification.

**Supplementary Figure 3. Extended Pig Kidney Simulated Transplantation Data**

Graphs displaying the terminal perfusion parameter values of **a,** venous potassium and **b,** venous lactate. Pairwise comparison was conducted by ordinary one-way ANOVA with Tukey’s multiple comparisons test. ** p < 0.05; ns, not significant*

**Supplemental Figure 4. Changes in Pig Kidney Histological Scoring**

Graphs depicting the change in histological scoring from **a,** right after procurement to the end of storage and from **b,** the end of storage to the end of simulated transplantation. Pairwise comparison was conducted by ordinary one-way ANOVA with Tukey’s multiple comparisons test. ** p < 0.05; ns, not significant*

**Supplemental Figure 5. 30D PF Kidneys Show Elevated Injury Compared to Kidneys Stored for 3 and 10 Days.**

**a,** Representative, macroscopic images of kidneys at the beginning and end of simulated transplantation. **b,** Representative, microscopic histological images of PAS tissue at the end of storage, and following simulated transplant. graphs depicting organ health metrics **c,** weight gain, **d,** creatinine clearance rate, **e,** terminal AST, and **f,** histological scoring. Pairwise comparison was conducted by ordinary one-way ANOVA with Tukey’s multiple comparisons test. ** p < 0.05; ns, not significant*

**Supplemental Figure 6. 30D PF Kidneys Show Dramatic Morphologic Injury on TEM.**

**a,** Representative transmission electron microscopy imaging of biopsies taken at the end of simulated transplantation. All images were taken at 10,000X magnification.

**Supplemental Figure 7. Flowchart for Human Kidney Partial Freezing**

**a,** Schematic diagram depicting the partial freezing protocol for human kidneys.

**Supplemental Figure 8. Extended Human Perfusion Parameters**

Graphs depicting perfusion parameters during subnormothermic perfusion **a,** terminal lactate, **b,** terminal potassium, **c,** total urine production, and **d,** creatinine clearance rate.Graphs depicting perfusion paramerers during simulated transplantation **e,** terminal resistance and **f,** cumulative urine production. Pairwise comparison was conducted by ordinary one-way ANOVA with Tukey’s multiple comparisons test or an unpaired t-test for one-on-one comparisons. ** p < 0.05; ns, not significant*

**Supplemental Figure 9. Change in Human Kidney Histological Scoring**

Graphs depicting the **a,** histological scoring at different stages of the PF process as well as the **b,** change in scoring between those stages. Graph depicting the change in histological scoring over the course of simulated transplantation. Pairwise comparison was conducted by ordinary one-way ANOVA with Tukey’s multiple comparisons test or an unpaired t-test for one-on-one comparisons. ** p < 0.05; ns, not significant*

**Supplemental Figure 10. Human Kidney Metabolomics**


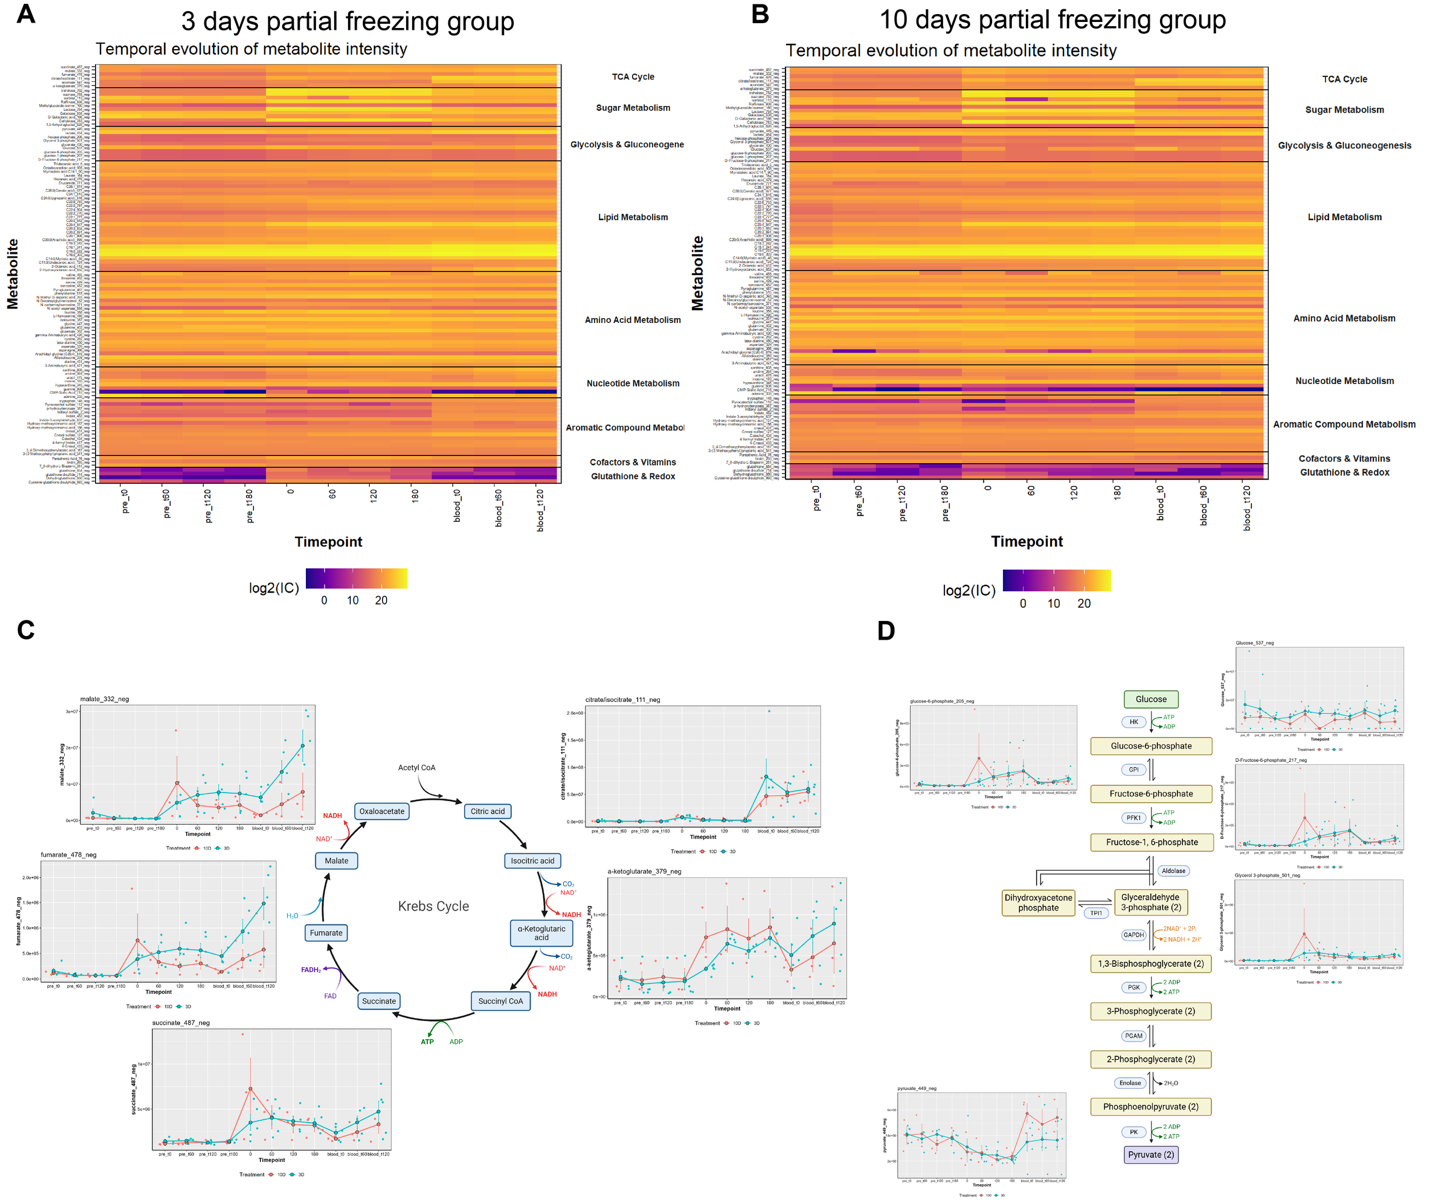


**Supplemental Figure 10. Metabolomic Analysis of Partially Frozen Human Kidneys**

Heatmap depicting the relative abundances of various metabolites throughout **a,** 3-day and **b,** 10-day PF. **c,** Graphs depicting the relative abundances of metabolites involved in the Krebs Cycle. **d,** Graphs depicting the relative abundances of metabolites involved in glycolysis.
